following cessation of Dicumarol. (Ziffer, A. M., Scopp, I. M., Beck, J., Baum, J., and Berger, A. R.: *Profound Bleeding after Dental Extractions during Dicumarol Therapy*, *New England J. Med.* 256: 351 (Feb. 21) 1957.)

**PULMONARY CIRCULATION** Inhalation of 5 per cent oxygen in dogs caused a fall of 45 per cent in oxygen saturation of arterial blood and a 25 per cent rise in pulmonary arterial pressure. The immediate pressure rise due to anoxia was delayed and less intense when the carotid and aortic bodies were denervated. Other evidence indicated a vasoconstriction of pulmonary vessels with anoxia. (Aviado, D. M., and others: *Effects of Anoxia on Pulmonary Circulation: Reflex Pulmonary Vasoconstriction*, *Am. J. Physiol.* 189: 253 (May) 1957.)

#### PULMONARY ARTERY PRESSURE

Increases in intratracheal pressure are quickly reflected in the pressure within the pulmonary artery. Block of the vagus nerve increases respiratory excursion but has no effect on pulmonary artery pressure in the normal subject. Vagus block in bronchospastic patients results in a decrease of systolic and diastolic pulmonary artery pressures. (Abbott, O. A., and others: *Comparative Studies of Function of Human Vagus and Sympathetic Nerves in Relation to Pulmonary Bed, Surgery* 42: 170 (July) 1957.)

#### PULMONARY RESISTANCE

In patients with congestive heart failure the assumption of the supine position results in a marked increase in viscous (air flow) resistance. The work of breathing in these patients is increased 25 per cent. This dyspnea of recumbency is possibly due to reduced patency of the air passages at low levels of lung inflation. (Cherniak, R. M., and others: *Significance of Pulmonary Elastic and Viscous Resistance in Orthopnea*, *Circulation* 15: 859 (June) 1957.)

#### PULMONARY VASCULAR RESISTANCE

The injection of 1.0 to 1.5 mg. of acetylcholine directly into the pulmonary artery reduced pulmonary arterial systolic and diastolic pressures and calculated pulmonary vascular resistance in three patients with primary pulmonary

hypertension, and in 7 of 9 patients with mitral stenosis. Systemic effects were minimal. It was concluded that there was a functional vasoconstriction in the pulmonary vascular bed, capable of being reversed by acetylcholine, in both mitral stenosis and in primary pulmonary hypertension. (Wood, P., Besterman, E. M., Towers, M. K., and McLroy, M. B.: *Effect of Acetylcholine on Pulmonary Vascular Resistance and Left Atrial Pressure in Mitral Stenosis*, *Brit. Heart J.* 19: 279 (April) 1957.)

#### COLLATERAL CIRCULATION

The collateral circulation of the dog's lung, that portion of the bronchial flow that drains into the pulmonary veins, normally amounts to 0.5 to 1 per cent of the total flow. (Salisbury, P. F., Weil, P., and State, D.: *Factors Influencing Collateral Blood Flow to Dog's Lung*, *Circulation Res.* 5: 303 (May) 1957.)

#### RESPIRATION RESISTANCE

Measurements of the elastic and nonelastic resistance to breathing in normal patients and those with diseased cardiorespiratory systems was determined before, during and after general anesthesia and surgical operations. The work of breathing increased 200 to 500 per cent during general anesthesia and interference of the chest wall movements by surgical assistance, such as retractors. (Brownlee, W. E., and Allbritton, F. F., Jr.: *Work of Breathing During Surgical Operations*, *A. M. A. Arch. Surg.* 74: 846 (June) 1957.)

#### HYPOXIA AND HYPERCAPNIA

Circulatory performance in hypoxia and hypercapnia represents the resultant of direct cardiac depressant effects and opposing reflexly mediated alterations in contractility and vascular tone. In dogs cardiac contractility increased on 10 per cent carbon dioxide but decreased steadily when reflex compensation was prevented by spinal transection, cardiac depression occurred on return to 100 per cent carbon dioxide. Though mild hypercapnia increased amplitude in both dog and man, severe hypercapnia markedly depressed the heart until reflex epinephrine discharge restored contractility toward normal. (Honig, C. R., and Tenney, S. M.: *Determinants of Circulatory Response to Hy-*

pozia and Hypercapnia, *Am. Heart J.* 53: 687 (May) 1957.)

**ACIDOSIS** The combination of a respiratory and metabolic acidosis occurred in a patient with arterial pH of 7.09 and little simultaneous change in arterial carbon dioxide content. The arterial carbon dioxide content was found misleading when mixed acid-base disturbance was present. (Fordham, C. C., and Reilman, A. S.: *Mixed Respiratory and Metabolic Acidosis*, *New England J. Med.* 256: 698 (April 11) 1957.)

**EXTRACORPOREAL CIRCULATION** A complete description of the use of extracorporeal circulation on 13 patients, of whom 8 survived, is given. An emphasis is made on the importance of metabolic acidosis occurring during heart operations, especially with by-pass. (Crafoord, C., and others: *Clinical Studies in Extracorporeal Circulation with Heart-Lung Machine*, *Acta chir. scandinav.* 112: 220 (March) 1957.)

**POSTOPERATIVE PULMONARY COMPLICATIONS** Using frequent chest roentgenograms postoperatively to determine pulmonary complications one group of patients was given breathing exercises and postural drainage. After twenty-four hours the incidence of pulmonary complications was significantly greater in the control group over those who were given pulmonary physiotherapy. (Wiklander, O., and Norlin, U.: *Effective Physiotherapy on Postoperative Pulmonary Complications*, *Acta chir. scandinav.* 112: 246 (March) 1957.)

**EXERTIONAL DYSPNEA** Primary muscular atrophy and amyotrophic lateral sclerosis may be associated with exertional dyspnea early in the course of the disease process before muscular atrophy and fasciculations in classic locations become evident. The clinician should consider these neurologic conditions in the differential diagnosis of dyspnea, especially if the cardiac and pulmonary findings are not compatible with the degree of respiratory disability. (Miller, R. D., Mulder, D. W., Fowler, W. S., and Olsen, A. M.: *Exertional Dyspnea: Primary Complaint in Unusual Cases of Progressive Muscular Atro-*

*phy and Amyotrophic Lateral Sclerosis*, *Ann. Int. Med.* 46: 119 (Jan.) 1957.)

**ALVEOLAR HYPOVENTILATION** A syndrome of alveolar hypoventilation and congestive heart failure occurred in a patient with normal lungs and chest bellows. Abnormally low ventilatory response to both exercise and carbon dioxide re-breathing indicated the primary role of impaired sensitivity of the respiratory center in etiology of the syndrome. (Richter, T., West, J. R., and Fishman, A.: *Syndrome of Alveolar Hypoventilation and Diminished Sensitivity of Respiratory Center*, *New England J. Med.* 256: 1165 (June 20) 1957.)

**PULMONARY INSUFFICIENCY** Pulmonary insufficiency may appear in one or more of the following forms: (1) a restrictive ventilatory defect characterized by inability of the patient to expand his thoracopulmonary structures normally, (2) an obstructive ventilatory defect in which the patient is unable to move air in or out of his chest at a normal rate, and (3) defects in blood-gas transport, that is, venous-arterial shunt, edematous alveolar-capillary membrane. Most patients with chronic pulmonary insufficiency cannot be cured but control is imperative. The essential objectives are (1) clear airways, (2) control of infection, and (3) good exchange of oxygen and carbon dioxide. (Moore, D. C., Morgan, E. H., and Yore, R. W.: *Postoperative Care of Patient with Chronic Respiratory Disease*, *GP* 15: 75 (June) 1957.)

**RESPIRATION AND EMOTIONS** Emotional states may have a profound effect upon the respiratory system. Dyspnea with actual bronchial narrowing (observed bronchoscopically by the author) is not an uncommon manifestation. Pharmacotherapy may be unsuccessful without elimination of psychic factors. (McCombs, R. P.: *Influence of Emotions upon Respiratory Tract*, *Bull. Tufts New England Med. Center* 3: 29 (Jan.-March) 1957.)

**VISCERAL AFFERENTS** Exploration of spinal cords in cats with a recording microelectrode supports the view that visceral afferent fibers ascend the spinal cord in the same regions as homologous somatic
